# Natural global motion processing by populations of direction-selective retinal ganglion cells

Jon Cafaro<sup>1</sup>, Joel Zylberberg<sup>2</sup>, Greg Field<sup>1\*</sup>

1. Department of Neurobiology, Duke University, Durham NC
2. Department of Physics and Astronomy, York University, Toronto ON

\* to whom correspondence should be addressed: [field@neuro.duke.edu](mailto:field@neuro.duke.edu)

## Abstract

Neural population codes discovered for simple artificial stimuli may not generalize to more naturalistic conditions. To explore this problem, we measured how populations of direction-selective ganglion cells (DSGCs) from mouse retina respond to a dynamic global motion stimulus that mimics self-motion through the environment. We then examined the encoding and decoding of motion direction in both individual and populations of DSGCs. Individual cells integrated global motion over ~200 ms, and responses were tuned to direction. However, responses were sparse, and broadly tuned, which severely limited decoding performance from small populations. In contrast, larger populations compensated for response sparsity, enabling decoding with high temporal precision (<100 ms). At these timescales, correlated spiking was minimal and had little impact on decoding performance, unlike results obtained using simpler motion stimuli decoded over longer timescales. We use these data to define and explore different DSGC population decoding regimes that utilize or mitigate correlated spiking to achieve high spatial versus high temporal resolution.

## Introduction

Sensory systems encode and decode information across populations of neurons. Understanding such population codes is fundamental to understanding the function of neural circuits and sensory processing<sup>1,2</sup>. Population codes are likely optimized for natural sensory stimuli but they are often probed using simple and artificial stimuli<sup>3,4</sup>. Such simplifications may limit the understanding of population codes and neural function in ethological contexts. In this paper, we examine a canonical population code, direction coding in mammalian ON-OFF (oo)DSGCs, in the context of a naturalistic stimulus.

In the mammalian retina, there are four types of ooDSGCs, each tiling space with their dendritic and receptive fields<sup>5-9</sup>. These types differ primarily in their preferred direction of motion, which are organized along four cardinal axes<sup>10-14</sup>. Direction is encoded across the four types by their relative firing rates. This produces a population code for direction that is relatively invariant to object speed and contrast<sup>15,16</sup>. ooDSGCs have been largely considered responsible for signaling local motion, because global motion attenuates (but does not eliminate) their responses<sup>17-20</sup>. A separate class of DSGCs, so-called ON DSGCs (oDSGCs), are minimally attenuated by global motion, and have thus been assumed to play a dominant role in signaling global motion<sup>21</sup>. Correspondingly, previous studies examining the fidelity and accuracy of the

ooDSGC population code have focused on local motion and artificial stimuli that are decoded at relatively long timescales<sup>16,22</sup>. These studies largely pointed toward a high-fidelity code that utilizes correlated activity in nearby ooDSGCs to signal the direction of local motion. However, recent work indicates that ooDSGCs may be organized to encode self-motion, a global motion signal<sup>14,23,24</sup>. This motivates an examination of ooDSGC individual and population responses under conditions in which the stimulus is a natural scene moving globally and dynamically on the retina. It also motivates understanding how the direction of global motion can be decoded from populations of mammalian DSGCs and the extent to which concepts applicable to decoding local motion at long timescales apply to decoding global motion at shorter, and perhaps more behaviorally-relevant, timescales.

To study DSGC responses, we recorded simultaneously the spiking activity from hundreds of retinal ganglion cells (RGCs) using a large-scale multielectrode array (MEA). We distinguished DSGCs from other RGCs based on their responses to drifting gratings<sup>11,25</sup>. We then projected dynamically moving natural images onto the retina. Individual ooDSGCs and oDSGCs exhibited similar encoding of dynamic global motion stimuli: they both integrated and low-pass filtered direction signals over a timescale of ~200 ms; they were both broadly tuned; and they both exhibited similar spike rates. Importantly, both ooDSGC and oDSGCs exhibited little trial-to-trial variability in their responses to dynamic global motion, indicating that while the responses were sparse, they were reliable.

We then utilized our more complete populations of ooDSGCs to examine the limitations inherent in decoding dynamic global motion signals from small and large ooDSGC populations. For a local quartet of ooDSGCs (each with a different preferred direction), determining the direction of global motion was marginally better than chance at short timescales (~100 ms). Decoding accuracy was improved by longer temporal integration of ooDSGC signals, however this is only an effective decoding strategy when changes in motion direction are infrequent. When motion direction changes frequently, large populations of ooDSGCs are needed to accurately and rapidly (< 100 ms) decode the direction of global motion. Large populations of ooDSGCs are available for decoding at no cost to spatial resolution because the nature of the motion signal is global. Furthermore, the short integration times used when decoding large populations result in largely uncorrelated population activity, which is counter to previous results decoding local motion at long timescales<sup>16,26</sup>. This limits the impact of correlated spiking on decoding accuracy in a dynamic global motion context. Thus, large populations of nearly-independent ooDSGC signals integrated over short timescales enables rapid decoding of direction. We generalize these findings to illustrate the tradeoffs inherent in decoding visual signals that vary in space versus time.

## Results

Visually driven responses of retinal ganglion cells (RGCs) were measured *ex vivo* using a multi-electrode array (MEA)<sup>11,25</sup>. Responses to drifting gratings distinguished ooDSGCs and oDSGCs from other RGCs over the MEA (see Methods). To measure the responses of DSGCs to dynamic and relatively natural global motion (Fig 1A), a natural scene from the Van Haterren image database<sup>27</sup> was dynamically moved over the retina. This paradigm drove the responses of dozens of identified and simultaneously recorded ooDSGCs and oDSGCs to a stimulus that approximated self-motion in a natural environment.

### **Individual ooDSGCs encode direction via integration of dynamic global motion**

Examining responses during direction changes can reveal how DSGCs integrate over motion direction history - an important factor in their response to a natural stimulus regime. Thus, we begin by focusing on ooDSGCs, and analyzing the relationship between their spiking and dynamic global motion of a natural scene. We randomly and iteratively translated a natural scene on the retina while recording ooDSGC spikes (see Methods). The, X and Y positions of the image were shifted in each frame of the video display by  $\Delta X(t)$  and  $\Delta Y(t)$ . Image position shifts were sampled independently from a Gaussian distribution, generating an approximately 'white noise' motion stimulus (Fig 1A; see Methods). The image shift distribution had a zero mean with a standard deviation  $\sim 20 \mu\text{m}/\text{frame}$  ( $\sim 25 \text{ deg/s}$ ). This value was chosen to maximize responses from ooDSGCs and fall within the range of eye movement velocities in freely moving rats<sup>28</sup> and retinal image motion in rabbits<sup>29</sup>. We calculated the correlation between  $\Delta X$  and  $\Delta Y$  values and spike rate, yielding a spike-triggered average (STA) of the displacements in X and Y for each cell (Fig 1B). Translating these Cartesian to polar coordinates facilitated visualizing the STA-directions of all ooDSGCs simultaneously (Fig 1C). Approximately 500 ms preceding a spike, the average motion direction fluctuated randomly for every ooDSGC (Fig 1Ci). However, between 300 to 100 ms preceding a spike, the motion direction coalesced to one of four cardinal directions. These results indicate that each ooDSGC encodes global motion along one of four directions and that spiking depends on the motion direction over  $\sim 200$  ms temporal window, with  $\sim 100$  ms latency to spiking (Fig 1C).

There are two possible strategies by which ooDSGCs may encode this motion. First, ooDSGCs may simply integrate motion signals over a temporal window. Alternatively, they may signal a change in direction by differentiating the motion trajectory. Differentiation is a common computation performed by the receptive fields of most RGCs (e.g. center-surround antagonism<sup>30-32</sup>). Pure integration requires a monophasic dependence on motion trajectories preceding spikes, while differentiation (in the case of direction changes  $>90$  degrees) requires a biphasic dependence on motion trajectories. Every ooDSGC exhibited a monophasic direction STA (peak/trough ratios at  $14.2 \pm 2.7$ ; Fig 1B), with a mean half width of  $111 \pm 2$  ms (Fig 1Cii). Thus, ooDSGCs encoding appears more related to the integration of direction for global motion stimuli within relatively short time windows preceding their spikes; they do not appear to explicitly signal changes (differentiation) in the motion direction. Below we explore the implications of needing to decode a signal that is updated continuously over short time windows.

### **Individual ooDSGCs generate sparse and broadly tuned responses to naturalistic global motion.**

The analyses above reveal the average motion kinetics and directions that precede ooDSGC spiking for global motion in a natural scene. However, the fidelity of encoding, and the accuracy of decoding, will depend strongly on the spiking dynamics elicited by these stimuli. Spiking was infrequent in ooDSGCs to natural scene global motion (Fig 1D,E), consistent with other measures of RGC activity during natural movie presentations<sup>33</sup>. For the global motion stimulus, firing rates ranged from 0.8 to 8.5 Hz, with one or more spikes occurring in a single neuron on less than 8% of the video frames (40 Hz frame rate). This result was replicated with

several different images and natural movies from cameras that were head mounted to animals (Fig 1Eii; See Methods), demonstrating that global motion in natural scenes typically evokes sparse responses across ooDSGCs.

One question that arises is whether or not these stimuli were reliably driving spikes in ooDSGCs, given the low spike rates. Repeated presentations of the same stimulus produced stereotyped ooDSSGC responses (Fig 1Fi), indicating that the response sparsity is not simply a result of presenting a stimulus that is incapable of evoking a response. Instead, these stimuli generated sparse responses that were reliable from trial to trial – within each response frame the spike count mean was approximately equal to the variance (mean fano factor  $\pm$  SEM =  $1.1 \pm 0.05$ ). However, the motion direction preceding individual spikes was highly variable (Fig 1G). To quantify the variability in motion direction preceding spikes, we calculated the difference between

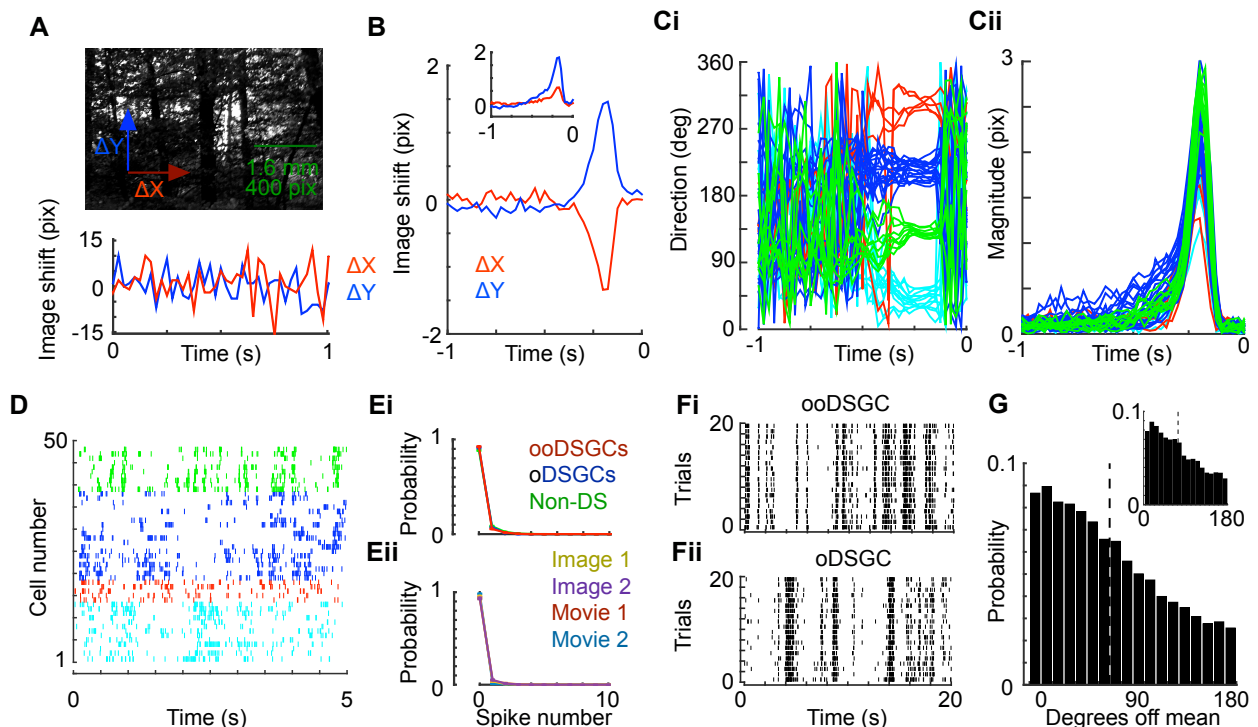

**Figure 1: DSGCs integrate the direction of global motion over time and respond sparsely with broad tuning to natural images.** **A.** Natural image presented (top) and displaced according to  $\Delta X$  and  $\Delta Y$  (bottom). **B.** Spike triggered average of  $\Delta X$  and  $\Delta Y$  for single example ooDSGC and an oDSGC (inset). **C.** Direction (Ci) and magnitude (Cii) of motion calculated from spike triggered average (STA) for all ooDSGCs in a single retinal recording. Color coded according to preferred direction in grating stimulus. **D.** Spike times during five seconds of dynamic global motion stimulus in (e.g. A) for all ooDSGCs in a single retinal recording; color indicates preferred direction determined from a drifting grating. **E.** Probability distributions for DSGCs in a single retinal recording using a jittered image (Ei) and for ooDSGC and oDSGCs in 2 different retinal recordings using 2 different jittered images and 2 different natural movies (Eii). Movies included video from a camera mounted on a mouse (Movie 1) and a cat (Movie 2). **F.** Spike raster of a single ooDSGC (Fi) or oDSGC (Fii) simultaneously recorded over several repeated presentations of the same jittered image. **G.** Difference between preferred direction from STA (panel Ci) at time of peak magnitude (panel Cii) and direction preceding each spike. Histogram includes data from all ooDSGC cells and all spikes from a single retina ( $n = 49$ ); similar results were observed in a second retinal recording. The inset shows the same analysis for all oDSGCs in the same recording.

the direction of motion preceding each spike and the STA direction (evaluated at the peak of the STA magnitude). This distribution is broad and on average the direction preceding a spike differs from the mean (preferred) direction by ~70 degrees (Fig 1G, dashed line). This variability will limit decoding performance, because the presence of a spike poorly constrains the preceding motion direction.

Variability in the prespike direction likely reflects several sources including: the tuning width of the ooDSGC, different direction trajectories across video frames filling the ooDSGC integration time, and aperture effects that allow local orientation to influence apparent direction within a receptive field<sup>34-36</sup>. Irrespective of the source, the stimulus variability preceding ooDSGC spiking combined with infrequent spiking, will limit the accuracy with which direction of global motion can be decoded from ooDSGC populations. Below we assess if the response properties described above are unique to ooDSGCs, or whether those observations also apply to oDSGCs.

### **oDSGCs respond similarly to ooDSGCs**

Previous work has suggested that signaling self-motion is performed by oDSGCs while ooDSGCs signal local object motion<sup>17</sup>. Thus, we compared the responses of oDSGCs to ooDSGCs to see if they exhibited distinct response properties to global motion in natural scenes. First, oDSGCs showed similar monophasic temporal integration to ooDSGCs (Fig 1B inset). Second, oDSGCs showed similar response sparsity to the same global motion stimuli (Fig 1Ei). Indeed, all recorded RGCs had similar response sparsity (Fig 1Ei). oDSGCs also exhibit similarly reliable responses to repeated presentation of the same global motion sequence for a natural scene (Fig Fii) and similar direction variability preceding a spike (Fig 1G, inset). Thus, we do not observe clear differences in the response statistics or encoding properties between oDSGCs and ooDSGCs to global motion of a natural image.

The analyses below leverage the larger populations of recorded ooDSGCs to test the ability to decode the direction of global motion from those populations and explores the factors limiting the accuracy of that decoding.

### **Quartets of ooDSGCs exhibit limited accuracy signaling the direction of global motion**

To begin to understand how the response properties of ooDSGC impact the decoding of motion, we applied an optimal linear estimator (OLE) to the responses from quartets of simultaneously recorded ooDSGCs. In brief, an OLE assigns a set of weights to each cell which, when scaled by the response of that cell and summed across cells, will minimize the mean squared error of the prediction (Fig 2A; see Methods). Each quartet consisted of ooDSGCs with different preferred directions and cells within 200  $\mu\text{m}$  of each other (Fig 2B). We begin with quartets of ooDSGCs because they form an elementary unit of a population code. Specifically, spikes from one ooDSGC poorly constrain motion direction, because of the broad direction range that can precede a spike. However, spikes distributed across a quartet of ooDSGCs can, in principle, be used to more accurately decode motion direction<sup>37</sup>. We begin with an OLE because it is a simple decoder that performs nearly optimally on ooDSGC population responses and can be simply implemented by downstream neurons<sup>22,38</sup>.



The first question we address with this approach is, how accurately can global motion in a natural scene be decoded from the responses produced by a local quartet of ooDSGCs? The answer is likely to depend on the duration over which the decoder integrates signals from the ooDSGCs, and the dynamics of stimulus motion. First, we examined the dependence on integration time. When integration time is short, the decoder is forced to estimate direction from responses produced within single video frames (~25 ms). This yielded low accuracy estimates of motion direction; the median expected error was ~80 degrees (Fig 2C-D). Note this analysis allows for a latency between the stimulus direction and ooDSGC responses (see Methods). The median error is reported throughout and provides the minimum error in decoding 50% of the time bins, an appropriate quantity when decoding continuously. For comparison, chance performance in direction estimation would be 90 degrees, and perfect performance would be 0 degrees. A major contributor to this high uncertainty in motion direction is that within ~25 ms, the most

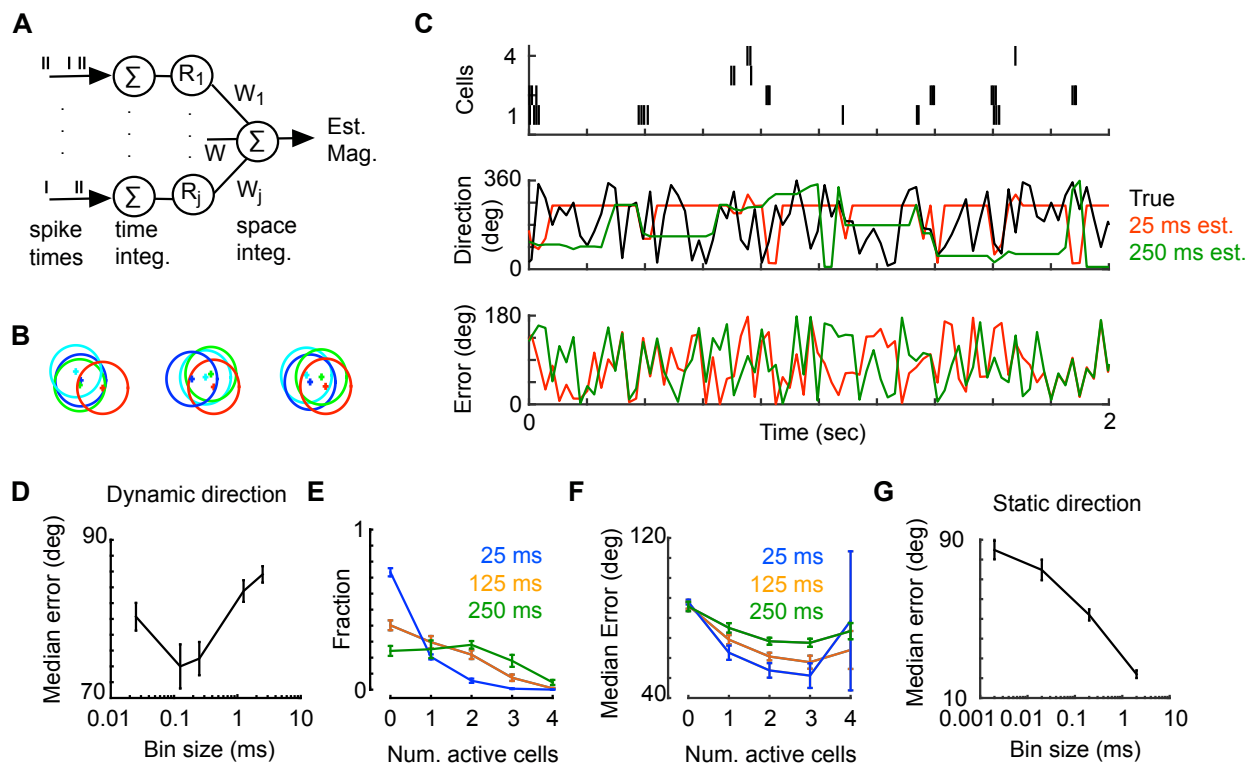

**Figure 2: ooDSGC quartets are limited in their decoding accuracy by response sparsity and dynamic motion.** **A**. Schematic of the decoder, the optimal linear estimator (OLE). **B**. Examples of four ooDSGC quartets. Relative location of each cell is marked from position on array and circles drawn, 300 μm diameter, provide a scale bar near the size of ooDSGC dendritic fields. **C**. *Top*: Spike response from an example quartet during a dynamic global motion stimulus (spike times are uniformly shifted for optimal decoding). *Middle*: Decoder provides estimate of direction for each frame change using two different spike integration times. *Bottom*: Acute difference between OLE and actual direction for each integration time. **D**. Median error over all decoded time points as a function of integration time from one retina (N=15 quartets). **E**. Fraction of bins with non-zero spikes in 0-4 cells in each quartet (same retina as in D). **F**. Median error as a function of number of cells in quartet with non-zero spikes (same retina as in D). **G**. Median error for all decoded time points as a function of integration time when decoding drifting image with direction and speed held constant (see Methods). Separately recorded retina from panels B-F (7 quartets). Error bars (D-G) show standard deviation across quartets.

frequent output from the quartet of ooDSGCs is zero spikes (Fig 2E). When there are no spikes, the decoder assigns a default constant, effectively guessing at the direction of motion. It is worth noting, that in a stimulus regime with constantly changing direction, this default is no worse than assuming the direction last decoded in the presence of spikes.

To test that the high error at short integration times results from the sparsity of the population response, we analyzed the frequency with which a given number of ooDSGCs responded within a quartet. For short integration times there is a high probability of zero spikes from any ooDSGC in the quartet (Fig 2E). Furthermore, decoding error depended on the number of cells responding within a given integration window - the error decreased sub-linearly for increasing cell numbers (Fig 2F). Errors were very high when four cells were responding in the same bin, which results from cancelation of oppositely tuned neurons.

One path toward improving decoding performance is for the decoder to integrate over longer time windows. This would allow for a larger fraction of decoded epochs to contain at least one spike from the quartet of ooDSGCs. However, increasing the integration time to 125 ms (5 stimulus frames) only modestly decreased the error of direction estimates to ~74 degrees. Furthermore, for longer integration times, average direction error increased (Fig 2D). Thus, decoding global motion from local quartets of ooDSGCs exhibits limited accuracy.

The increase in decoding error at longer integration times is likely a result of the dynamic stimulus, which frequently changes directions. Thus, integrating for longer periods of time incurs a cost: the inability to decode rapid changes in direction. To test this hypothesis, we switched from decoding an image that changed direction and speed dynamically to a drifting natural image that moved in a constant direction and speed (see Methods). As hypothesized, images moved in a static direction show only increases in accuracy with increasing integration time (Fig 2G), as the decoder was afforded the opportunity of accumulating spikes over long periods of time without a change in direction. With a 2s integration window, the decoder could achieve average errors down to ~20 degrees.

The analyses above show that quartets of local ooDSGC provide little information about global motion direction in a natural scene at short time scales. Their limited decoding accuracy is largely due to the sparse (infrequent) spiking generated by the stimulus. Furthermore, decoding is limited to short integration times when motion is dynamic because integrating over longer time windows fails to track changes in motion direction. This is at least partly a consequence of ooDSGCs integrating, instead of differentiating, motion (Fig 1B). If decoding accuracy is limited by the sparsity of the population response, do larger populations of ooDSGCs allow for more accurate decoding of dynamic motion at short integration times?

### **Large ooDSGC populations can encode direction continuously over short time scales**

To begin to test the effect of ooDSGC population size on decoding global motion, we decoded the direction of dynamic global motion using the responses of all ooDSGCs measured in an experiment (Fig 3A). While these populations are not complete, due to imperfect sampling of RGCs over the MEA, this analysis permitted data-based decoding on 43-50 ooDSGCs in individual experiments. Furthermore, the population spanned lengths of ~750  $\mu\text{m}$  ( $25^\circ$  of visual arc) on the retina.

Larger populations of ooDSGCs increase the frequency with which one or more cells spikes for a given integration time, relative to quartets. This effectively decreases the sparsity of the population response to which the decoder has access. As a result, the median error from decoding these larger population responses was significantly smaller than decoding quartets, particularly for short integration times (Fig 3B-C). For example, at ~25 ms (a single video frame),

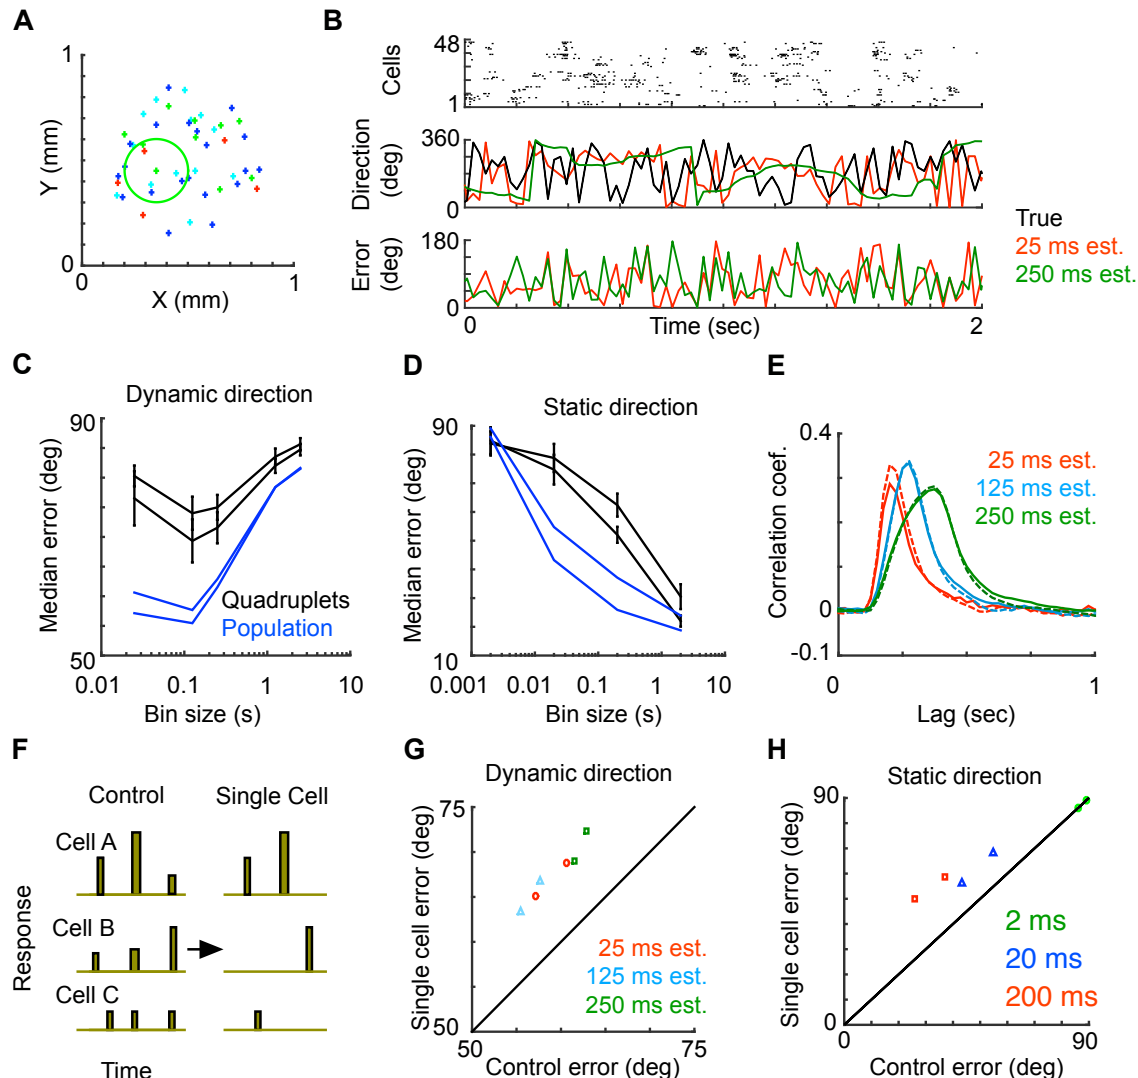

**Figure 3: Larger populations of ooDSGCs improve decoding accuracy with shorter integration times.** **A.** Location on array of all ooDSGCs recorded in single retina. Circle provides estimate of the size of receptive field and colors indicate preferred direction. **B.** *Top*: Spike response from recorded ooDSGC population during dynamic global motion stimulus. *Middle*: Decoder provides estimate of direction for each frame change using two different spike integration times. *Bottom*: Acute difference between OLE and actual direction for each integration time. **C.** Median error for all decoded time points as a function of integration time. For both the quartets (as in Figure 2D) recorded in 2 different retinas and the entire population for 2 different retinas. No error bars are provided for the estimate across the entire population. **D.** As in panel C using an image with a constant direction (see Methods). **E.** Cross correlation between stimulus image displacement estimate and actual stimulus ( $\Delta X$ =solid or  $\Delta Y$ =dashed line). **F.** Schematic showing "single cell" manipulation of input to OLE. **G.** Median error using control and "single cell" input to OLE. Results from two retinas are shown at 3 different spike integration times. **H.** Same as panel F using image with direction held constant.



decoding error was reduced to 55-60 degrees for a population of 48 ooDSGCs, down from 80 degrees for a quartet. It is notable that decoding direction from a population on a single frame was so accurate, given that a single frame is much briefer than the integration time of the STA.

Similar to the results from ooDSGC quartets, increasing the integration time also caused an increase in median errors for larger ooDSGC populations (Fig 3B-C). This increase is because the global motion is dynamic, causing the decoder to estimate a single direction of motion from responses that are produced by multiple directions. When the direction of the stimulus was constant, longer integration times resulted in a monotonic decrease in error for large populations of ooDSGCs (Fig 3D). For long integration times (2 s), decoding error fell to ~20 degrees with a population of 48 ooDSGCs. Thus, larger ooDSGC populations allow for more accurate decoding of global motion in natural scenes within briefer integration times. However, long integration times limit decoding performance when global motion changes dynamically.

Thus far we have shown that long stimulus integration impairs the ability of ooDSGC populations to accurately estimate dynamic motion. Long stimulus integration has an additional cost, which is to delay the time at which direction estimates are most accurate relative to the stimulus. To measure this delay we computed the cross correlation between the actual and estimated image displacements (in  $\Delta X$  and  $\Delta Y$ ). The cross-correlation between these values was significantly delayed and broader at longer integration times (Fig 3E). Thus, integration over short timescales allows downstream circuits to decode more rapidly, thereby following more frequent changes in direction. This is only achievable with large populations of ooDSGCs because quartets perform marginally better than chance within the same integration times.

Increasing the population size could improve decoding in two different ways: 1) by increasing the number of time points with single responsive cells; and/or 2) increasing the number of time bins with multiple responsive cells. To measure the extent to which the error depended on a simultaneous multi-cell response, the OLE was trained on the full response set and tested on either the full response set, or on a modified response set in which only a single cell response (the largest response) at each time bin was provided to the decoder (Fig 3F). If direction decoding is entirely mediated by single cells, then there should be no difference between using the full and modified response sets. There was a significant increase in the error when decoding on the modified response set in both the dynamic (Fig 3G) and static (Fig 3H) direction stimuli. Thus, the decoding accuracy in larger populations relies on simultaneous activity from multiple ooDSGCs.

The simultaneous activity between ooDSGCs that underlies a population response could arise purely through independent responses across ooDSGCs or through correlated subsets of ooDSGCs. In the next section we examine the extent to which the accuracy of rapid decoding in large ooDSGCs populations relies on response correlations within the population.

### **Rapid-global direction of motion is encoded by large populations of independent ooDSGCs**

Natural scenes have local intensity correlations that result in correlated activity between nearby RGCs<sup>39,40</sup>. Recent work has indicated that such response correlations promote robust decoding by maintaining the relative activity between ooDSGCs with different preferred directions<sup>16,26</sup>. To what extent are response correlations important to maintaining the accuracy of rapid decoding of global motion from large ooDSGC populations?

To understand how the correlation structure contributes to decoding accuracy, we measured and manipulated response correlations across the ooDSGC populations. In this section we focused entirely on the static direction stimulus, which permitted manipulations that would be impossible across a dynamic direction stimulus.

First, we examined the correlation structure in the population by mapping the pairwise correlation coefficients as a function of (1) distance between pairs, (2) relative preferred direction, and (3) integration time (Fig 4Ai-iii). The correlation coefficients were calculated within a trial and averaged across all trials and directions. Thus, the response correlations reported here include signal and noise correlations and measure the tendency of cells to respond to the same image structure. The correlation coefficient between pairs of ooDSGCs increases with the integration time used to calculate the responses, as previously noted<sup>41</sup>, - short integration times diminish correlations (Fig 4A-note axes scale). Thus, over short integration times, correlations are small, suggesting they may not influence decoding accuracy to the extent observed in previous studies that considered longer integration times<sup>16,26</sup>.

However, for a given integration time, the correlation is higher for cells that are spatially closer and modulated less prominently by their relative preferred directions (eg. Fig 4Ai)<sup>40</sup>. This reflects the increased tendency of nearby cells to respond to the same part of the image as the dominant determinant of correlation structure. This led us to ask if the higher correlations in nearby cells are important in maintaining the accuracy of decoding from large ooDSGC populations over short time scales. In other words, are responses to global motion encoded by many small-local populations of correlated cells?

To test how decoding error depends on the correlations between ooDSGCs, the OLE was tested on either the unmodified (control) response set or a decorrelated (shifted) response set, in which the response bins were shifted in time during a drifting image (Fig 4B). Shifting responses in time independently across ooDSGCs eliminates correlations due to local contrast fluctuations in the stimulus and noise correlations introduced by retinal circuits. However, this manipulation maintains correlations due to the direction of motion. Thus, shifting responses in time undermines the population response structure caused by the particular spatial locations of the cells, and is similar to selecting populations of ooDSGCs randomly in space. Across a range of integration times, the 'shifted' response sets showed little change in continuous decoding error (Fig 4C). This result suggests that decoding of direction from large ooDSGC populations does not depend on correlations, even when those correlations are relatively large.

These result differ substantially from previous findings where trial-to-trial noise correlations alone were shown to have significant impact by decreasing decoding error<sup>16,26</sup>. However, measured populations of incomplete mosaics undersample overlapping groups of cells, which may undermine the impact of large correlations measured during long integration times. To better understand how integration time impacts the decoder's sensitivity to correlations, we focused on decoding in quadruplets, which are selected based on their overlap, during times periods when they were strongly responding. We used the OLE magnitude to select the time bins in which the ooDSGCs population was responding most strongly (Fig 2A). The OLE magnitude will be highest when multiple cells, with similar tuning are responding most strongly. We assess the median error during the top 10% magnitude responses and term this the "conditional error" (because it is conditioned on the OLE magnitude being high). The conditional error in quadruplets was sensitive to correlation structure at long integration times, increasing the error when correlations were

disrupted (Fig 4D), but not at short integration times. Thus, the impact of correlations on decoding depends critically on the integration time – correlations being important when decoding large responses integrated over long time windows. We later extend these results to large modeled DS populations with complete mosaics (Fig 5).

### Non-DS cells do not improve direction decoding over short integration times

The analyses above indicate that correlations between ooDSGCs are not useful to account for local image intensity when decoding the direction of motion in short integration times. However, local image intensity influences the spike rates of non-DS, as well as DSGCs. Potentially, non-DS RGCs that share substantial receptive field overlap with ooDSGCs could be used to help decode the direction of motion by discounting local image intensity. Indeed, correlations between tuned and untuned neurons have been shown to improve decoding from other neural populations<sup>42,43</sup>.

To assay if non-DS RGCs can help decode the direction of motion we decoded the direction of motion using both identified ooDSGCs and non-DS cells. Using local groups with substantial receptive field overlap (~30 neurons), the direction of motion was first decoded using an OLE. There was not a significant difference between decoding performance with or without non-DS cells (data not shown). This result is expected, because an OLE, while sensitive to correlation structure, does not explicitly use correlated activity to decode<sup>44,45</sup>. Alternatively, an

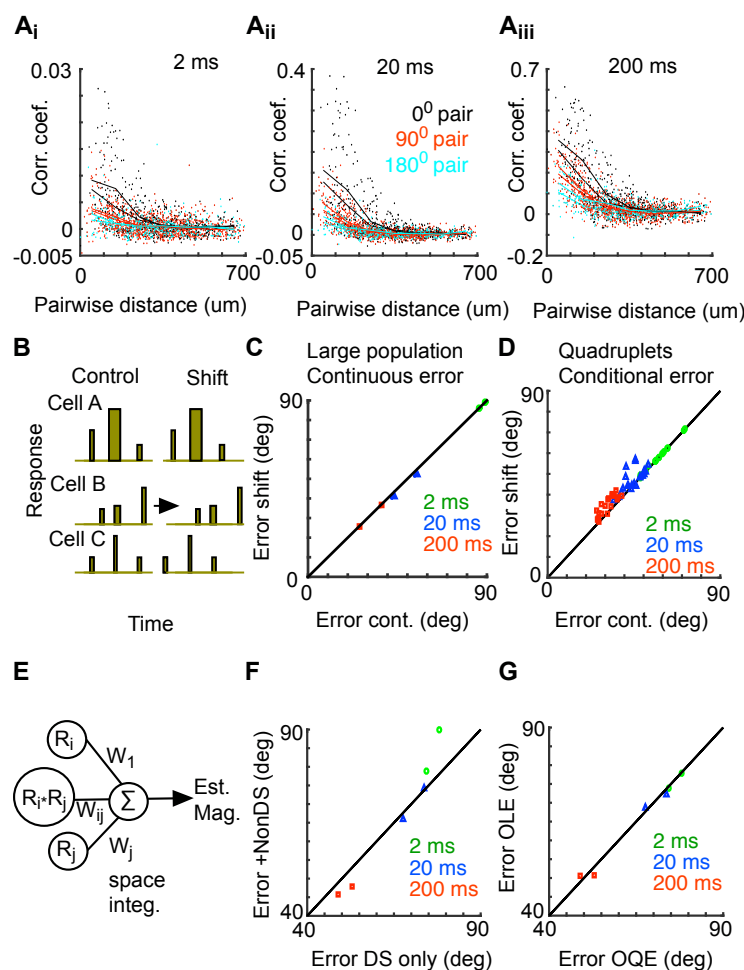

**Figure 4. Correlation coefficients are small on short time scales and have little impact on decoding accuracy. A.**

Correlation coefficient between pairs of ooDSGCs as a function of the distance between pairs. All possible pairs within a retina are plotted for two different retinas (points) and the averages within a binned distance are plotted for each retina (lines). Pairs are color coded by the angle difference of their preferred direction during the drifting grating. Panels i-iii present the same data but calculated using three different integration times. **B.** Schematic illustrating the “shift” manipulation in the input to the OLE. **C.** Median error using control and “shifted” input to the OLE. **D.** Same as C but using ooDSGC quartets and decoding only during the periods of high magnitude direction estimates. **E.** Schematic illustrating decoding with OQE. **F.** Decoding error of small local population of ooDSGCs and Non-DS cell responses using an OQE. **G.** Decoding error of small local population of ooDSGCs only using an OQE and OLE.

Optimal Quadratic Estimator (OQE) explicitly uses correlations between neurons to decode by weighting the synchronous activity between neurons to estimate the direction of motion<sup>45</sup> (Fig 4E; see Methods). The OQE accuracy was similar when decoding from DS only versus DS and Non-DS populations over short integration times (Fig 4F). There is a small decrease in error when including Non-DS cells when decoding with longer integration times (Fig 4F). Indeed, the OQE and OLE using DS cells alone provided similar accuracy (Fig 4G), indicating little benefit from this form of non-linear decoding in these conditions. Thus, decoding of the direction of motion continuously with short integration bins is effectively performed by a linear decoder that integrates signals from a large tuned population with little benefit from correlated activity between tuned or untuned neurons. Note, we are not saying the other classes of decoders, more explicitly constructed to decode motion from untuned neurons (e.g. Reichardt detectors) would not be useful for bolstering signals from DSGCs.

### **Noise and temporal integration dictate spatial decoding constraints in model**

The analyses above indicate that large populations of nearly independent ooDSGCs can be leveraged to rapidly decode the direction of motion, while temporal integration increases the importance of spatial correlation structure for accurate decoding. Ostensibly, the relationship between temporal integration and sensitivity to local correlations could be explained by the presence of high temporal frequency noise in ooDSGC responses. To better understand how noise and temporal integration influence population decoding we created a model that simulated responses from complete ooDSGC mosaics of various size and organization (see Methods). In brief, each modeled DS-unit response was generated from a distinct linear-nonlinear model (Fig 5A) with its position and direction orientation determined by one of four modeled mosaics (Fig 5B). The linear filter provides direction tuning and the non-linearity was adjusted to generate on-off responses with sparsity similar to that in the data. The DS-units were stimulated with a moving image used on the retina and the direction of motion was decoded at each time point from the population responses (Fig 5C). To test the spatial sensitivity of the decoder, populations were decoded either from local subsets (Fig 5Bii) or from DS-units with randomly chosen spatial locations (Fig 5Biii).

To begin, the response of the DS-units was noiseless. In this case, correlations between nearby DS-units was much higher than that observed in the measured data (Fig 5D, black curve). These correlations are caused by local image statistics and while they are diminished by the non-linearity that produces the sparse responses, they remain very high between cells with high receptive field overlap. In the absence of noise, decoding error was substantially increased when decoding from DS-units with random spatial locations (Fig 5Ei) or shuffled responses (data not shown) – supporting previous work illustrating the importance of maintaining correlations in decoding direction<sup>16,26</sup>. Adding independent noise to each DS-unit reduced local correlations substantially (Fig 5D red curve) and greatly reduced the sensitivity of decoder performance on the spatial arrangement of the DS-units (Fig 5Eii). Finally, temporally integrating the noisy responses partially rescued the correlation structure established by the natural image (Fig 5D blue curve) and increased the sensitivity of the decoder to spatial structure (Fig 5Eiii). This model illustrates that temporal integration influences correlation structure (at least in this example) and that it also dictates the decoder's reliance on those correlations. This helps to resolve the discrepancy between this study and previous studies which have highlighted the importance of

correlations for decoding DSGC population responses: Here, brief temporal integration was required to decode dynamic global motion, while previous work focused long temporal integration because motion stimuli were local and had a static velocity.

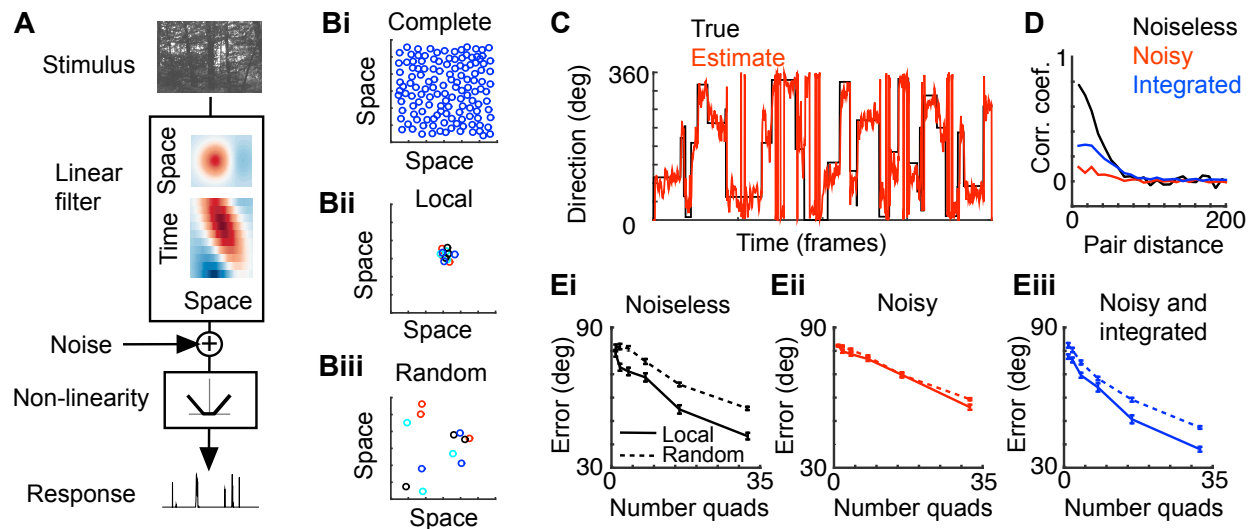

**Figure 5. Model of ooDSGC populations demonstrates how natural images, integration time and noise influence correlations and decoding.** **A.** Schematic of a single modeled DS-unit. **B.** Example of receptive field positions subsampled from complete DS-unit mosaics (Bi- showing 1 of 4 complete mosaics) when decoding three spatially local (Bii) or random (Biii) quadruplets. Circles illustrate one standard deviation of receptive field size. **C.** Example of image direction and decoded direction estimate at each point in time. **D.** Average pairwise correlation coefficient within a large population of modeled DS-units as a function of distance between pairs. **E.** Decoding error versus size of DS-unit population in either a noiseless model (Ei), a noisy model (Eii), or a noisy model with temporal integration (Eiii).

## Discussion

We assayed the potential of ooDSGCs to signal the direction of self-motion. We found that individual ooDSGCs respond sparsely to a broad range of motion directions. This sparsity necessitates long integration times to decode accurately from small populations. It also prohibits the temporal resolution necessary for a nearly continuous and rapid decoding of dynamic changes in motion direction. On the other hand, rapid changes in the direction of global motion in natural scenes can be accurately decoded from large populations of ooDSGCs. The accuracy and speed of the population code for dynamic global motion relies on a large population of relatively independent ooDSGCs. Previous studies have shown that decoding local and static velocity motion relies on small correlated populations with long integration times. Thus, these population codes trade temporal and spatial limitations: Integrating over larger populations allows decoding more rapid stimulus changes at the cost to spatial resolution. Importantly, this tradeoff fundamentally changes the sensitivity of the population code to its correlation structure because this structure is relevant for decoding local motion, but not for decoding global motion. Below we discuss these findings in the context of previous research.



## Functional role of ooDSGCs

Several lines of evidence have supported an exclusive role of ooDSGCs in coding local motion, but this and other studies should diminish the certainty of that assumption<sup>14,23,24</sup>. First, we show here that despite attenuation from the surround<sup>17,19,20</sup>, or perhaps in part aided by it<sup>46</sup>, ooDSGCs maintain direction selectivity and can effectively encode the direction of motion during global motion in dynamic natural scenes. Second, it has been pointed out that the density and size of the ooDSGC population seems unnecessary to detect global motion<sup>17</sup>. While this supposition seems reasonable, we show in this study that large dense populations are necessary to accurately and rapidly signal the dynamic global motion in natural scenes that would accompany self-motion because of the sparsity of ooDSGC responses. Third, ooDSGCs exhibit similar response structure to oDSGCs to dynamic global motion (Fig 1). While the incompleteness of our oDSGC populations prevented an unambiguous analysis of decoding their responses, the similarity in their encoding properties to ooDSGCs suggests similar decoding performance. Thus, this study supports the possibility that ooDSGCs function as encoders of self-motion<sup>23</sup>.

This study does not rule out the possibility that ooDSGCs also encode local motion. Previous studies have clearly shown that ooDSGCs can encode the direction of spots and bars, which may be reasonable proxies for local motion in nature. Indeed, using the same recordings we are able to decode the direction of local objects that follow the identical trajectory as the natural scene (data not shown) and qualitatively track local motion in movies of moving animals. Additionally, it is important to note that different downstream neural circuits could extract both local and global motion from the same ooDSGC population. This study reveals some of the neural constraints imposed by decoding the ooDSGCs populations for either local or global motion.

## Challenges and constraints to the ooDSGC population code for naturalistic global dynamic motion

ooDSGCs employ many different mechanisms to maintain robust encoding of direction in the face of stimulus variability<sup>47-49</sup>. In this paper, we show the responses of ooDSGCs to dynamic global motion were sparse and broadly tuned -- presenting challenges to downstream decoders. What are the sources of this sparsity and tuning breadth and what is their significance for the population code?

Previous work has shown ooDSGCs have attenuated responses to surround activation during simple artificial stimuli<sup>17-20</sup> suggesting an optimization for local over global motion. However, recent work shows this surround activation maintains direction selectivity<sup>19</sup> and preferentially attenuates luminance responses<sup>46</sup>, suggesting that the attenuation to global motion emphasizes direction information rather than obscuring it. Consistent with attenuation of local luminance responses, we observe that simultaneous activity across the four different ooDSGCs types is infrequent (Fig 2E). This sparsity is similar to measurements from other RGCs during naturalistic stimuli<sup>33</sup> - a feature of both the spatial frequencies in natural stimuli and nonlinearities that generate RGC responses<sup>40</sup>. The challenges imposed by sparsely responding DS populations have rarely been considered because previous studies have focused on stimulus conditions when population responses exhibit high firing rates<sup>22,50-52</sup>. Here, we take the perspective that a rapid behavioral response to self-motion requires a continuous readout from the ooDSGC population - making response sparsity from ooDSGCs a challenge that must be met by downstream circuits.

A second challenge to decoding direction during dynamic global motion is that a wide range of stimuli can precede a spike from a single cell. While ooDSGCs maintain their cruciform direction preferences on average (Fig 1C), the direction distribution preceding a spike is broad (Fig 1G). The variability in the direction preceding a spike is likely due to several factors - many of which are inherent to dynamic naturalistic stimuli. First, unlike moving bars, objects in the natural scene do not often encounter the receptive field exactly perpendicular to their axis of motion. Viewed through the spatially limited ooDSGC receptive field, the local orientation can obscure the true global motion direction -- the so called "aperture problem"<sup>34-36</sup>. Second, we demonstrate that ooDSGCs integrate direction over time, thus their response during a dynamic direction stimulus cannot be assigned to a single stimulus point but better reflects the average direction in the ~200 ms preceding the spike (Fig 1B). Finally, this variability in the direction of motion preceding a spike also reflects neural variability (Fig 1F), though our experiments with repeated stimuli suggest this is a minor contribution to the wide range of motion directions that preceded spikes in DSGCs.

Both the response sparsity and stimulus variability preceding a spike challenges a downstream decoder that must continuously estimate a dynamic stimulus. Previous studies decoding dynamic motion stimuli from retina have utilized the optimal linear filter approach described by Warland and colleagues<sup>51-53</sup>. This approach temporally integrates spike rates with a fixed filter to provide a continuous optimal linear estimate. Our approach differs from the optimal linear filter approach because we explore a range of integration times. Integrating over or under the optimal temporal range will increase the total mean squared error of the estimate but can decrease the error at specific temporal frequencies; this highlights spatial-temporal tradeoffs inherent in decoding visual information. While previous studies have used long temporal integration windows to improve decoding<sup>22</sup> we show that such strategies come at a significant cost to temporal resolution for decoding dynamic stimuli (Fig 2D). The cost of temporal integration necessitates larger populations to enable accurate decoding of rapid stimulus changes (Fig 3C). This spatial-temporal tradeoff in decoding has intriguing parallels with RGC and V1 receptive fields in which RGC types with larger spatial receptive field also integrate over shorter time durations<sup>54</sup>, and V1 neurons that prefer lower spatial frequencies also prefer faster gratings<sup>55</sup>. Indeed, receptive fields optimized to natural scenes display anticorrelations in their preferred spatial and temporal frequencies<sup>56</sup> suggesting a fundamental spatial-temporal tradeoff to decoding visual stimuli.

To better illustrate the spatial-temporal tradeoff in decoding we constructed a simple model of signal and noise separation (Fig 6). In this model, noise is separated from signal using a simple linear filter that integrates over space and time (Fig 6A). As we observed for decoding ooDSGC population responses, temporal integration can improve signal detection by preferentially attenuating high frequency noise. This noise reduction strategy is limited though by the presence of a high (temporal) frequency signal, as further integration begins to degrade both signal and noise (Fig 6B<sub>i</sub>). The same problem occurs when integrating spatially (Fig 6B<sub>ii</sub>). However, the greater the spatial integration, the less temporal integration is needed to improve signal detection, sparing the high frequency temporal signal. A similar trade-off can be made in the opposite direction, by sacrificing temporal resolution for greater spatial resolution. Thus, in extracting information, a decoder can choose to focus on spatial or temporal resolution, at a cost to the temporal or spatial resolution, respectively (Fig 6C). Dynamic global motion requires high

temporal resolution but minimal spatial resolution: We show that the population response of ooDSGCs permits a regime for accurately decoding this stimulus at short timescales with a simple linear decoder.

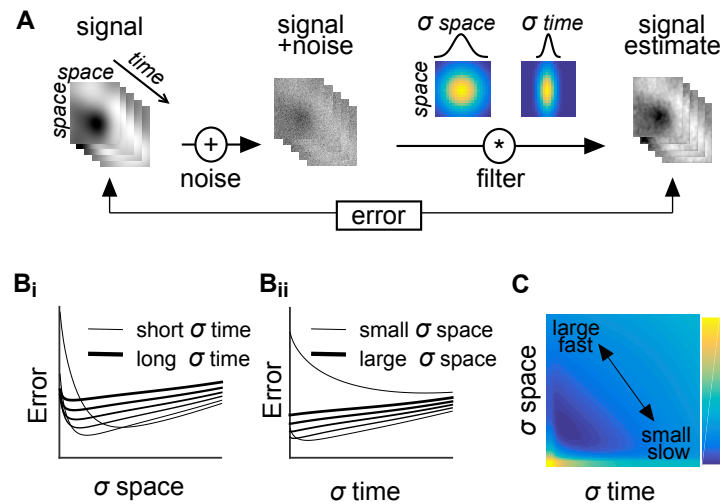

**Figure 6. Separating signal and noise using spatial or temporal integration, sparing resolution in the dimension not integrated.** **A.** Schematic of simple model illustrating signal corrupted by noise, integration with spatial and temporal linear filters, and estimate comparison. **B.** Error as a function of integrating spatially (Bi) or temporally (Bii) for signals that have been integrated with increasingly long temporal (Bi) or large spatial (Bii) filters. **C.** Error as a function of the temporal and spatial filter size.

### The importance of correlation on neural decoding

The role of correlated activity in neural coding is a subject of intense focus in neuroscience with the goal of understanding how neural populations code for sensory variables<sup>44,57,58</sup>. ooDSGCs have provided a useful model system to understand the sources and impacts of correlated activity<sup>16,26,59</sup>. Those studies largely pointed to correlations exerting a benefit upon DSGC population codes. Here we show that ooDSGCs correlations with nearby cells are small when integrated over short time periods (Fig 4A) and have little impact on decoding accuracy (Fig 4C-D). This finding reduces the likelihood of ooDSGCs encoding direction information via precise synchronous responses<sup>60,61</sup>. We also show DSGC with non-DS RGC correlations weakly impacted decoding error over short integration times (Fig 4G). The lack of reliance on noise correlations during these short integration times is supported by other recent work in salamander<sup>52</sup>.

However, consistent with previous work, we show that the correlations increase with longer integration times and begin to have some impact on decoding at longer timescales (Fig 4D). The relationship between spike correlations and decoder integration means that shared noise exists at lower temporal frequencies than independent noise. Thus, as demonstrated in a model (Fig 5), temporal integration diminishes independent noise and strengthens correlations in local populations, shifting the decoder's input from independent to locally correlated populations.

This study indicates that the importance of local decoding and correlation in the ooDSGCs will be heavily influenced by the integration time of the decoder. Thus, neurons downstream of the retina which decode local stimuli can leverage temporal integration to diminish independent noise without sacrificing spatial resolution. This temporal integration also favors local correlations which help maintain a robust population response during the transient appearance of the stimuli. In contrast, downstream neurons that decode global stimuli, which could benefit from rapid decoding, compensate for lack of local correlations with larger populations of independent cells. Thus, the structure of the independent and correlated noise suggests distinct decoding regimes - decoders for large, fast visual stimuli relying on independent inputs and decoders for small and

slow stimuli using correlated inputs. This may help explain why ooDSGC axons diverge to multiple downstream brain circuits including the lateral geniculate and superior colliculus<sup>14</sup>. Future work may reveal that these distinct circuits instantiate these distinct decoding regimes. It is also possible that neuromodulators alter the integration times<sup>62</sup> within a single circuit, switching between the two decoding regimes dynamically depending on current task demands.

**Acknowledgements:** We would like to thank G. Awatramani, N-Y Jun, B. Murphy-Baum, L. Osborne, S. Roy, X. Yao, for comments on drafts of this manuscript. We thank T. Mrsic-Flogal, and F. Iacaruso for providing a movie from a camera attached to the head of a mouse. This work was supported by the Whitehead Scholars Program at Duke University and NEI/NIH grant R01 EY024567 (G.D.F.).

## Methods

### Mice and retina dissection procedures

Retinas were removed and recorded from C57BL/6J and CBA/CaJ x C57BL/6J mice between the ages of 1 month and 1 year. The strains showed no differences to the results reported in this study, thus data were pooled. Mice were used in accordance with the Duke University Institutional Animal Care and Use Committee.

Retina dissection was optimized to maintain response sensitivity. Mice were dark-adapted overnight, euthanized via decapitation, eyes were enucleated, and a piece of retina (~1-2mm<sup>2</sup>) was isolated from the pigmented epithelium<sup>11</sup>. Retina isolation was performed in Ames solution (room temperature) bubbled with 95% O<sub>2</sub> and 5% CO<sub>2</sub>. All procedures were performed in the dark under IR light. The retina was isolated from the dorsal half of the eye (identified from vasculature) to increase the fraction of M-opsin expressed in the cones for better overlap with the spectrum of the visual display.

### *Multi-electrode array recording, spike sorting, cell position determination*

Electrical activity was measured from RGCs on a multielectrode array (MEA). Spikes were identified, sorted into individual cell clusters, and soma positions on the MEA were estimated as previously described<sup>11,63</sup>. Electrical activity was measured from RGCs using a hexagonal large-scale MEA, which was ~490 μm along an edge with 30 μm spacing between 519 electrodes<sup>63,64</sup>. Retinas were held against the MEA with a permeable membrane and were perfused with Ames solution (34 °C) bubbled with 95% O<sub>2</sub> and 5% CO<sub>2</sub>.

Electrical activity was analyzed offline to identify and sort spikes into individual cell clusters<sup>63,64</sup>. Briefly, on each electrode, spikes were identified by a voltage threshold and voltage waveforms were concatenated across the six surrounding electrodes. These concatenated waveforms were parameterized with principal components analysis (PCA) and clustered with a mixture of gaussians model, providing putative cell assignments. Putative cells were analyzed if their spike time autocorrelation showed less than 10% refractory period violations and 25% spike time correlation with a cell identified on a nearby electrode, indicating spikes were from a single and uniquely identified neuron.

Soma position on the array was used to identify quadruplets (Fig 2) and pairwise distances between cells (Fig 3A). Soma position was estimated from the Electrical Image (EI) on the

array<sup>11,65</sup>. The EI consisted of the average voltage on each electrode preceding a spike<sup>66</sup>. The position of the soma was taken as the center of mass of the EI.

## Visual stimulus

The retina was stimulated at photopic light levels (8000 Rh\*/s) with a gamma-corrected OLED display (SVGA+XL Rev3 from eMagin). Three types of visual stimuli were presented to the retina and controlled via custom software written in Matlab utilizing the MGL library ([gru.stanford.edu](http://gru.stanford.edu)). First, drifting gratings, at two different temporal frequencies, were used to identify ooDSGCs (see RGC classification). Second, natural images, taken from the van Hateren image database<sup>27</sup>, were presented to probe RGCs responses to global motion in natural images. Natural images were presented in two different stimulus protocols; using either dynamic or static velocity. Finally, natural movies from a head cam mounted mouse (from lab of Thomas Mrsic-Flogel) and cat<sup>67</sup> were used to further test response sparsity.

In the dynamic velocity protocol, the same image was presented in the same orientation on every frame at image locations, X and Y. The average frame rate was 40 Hz (~25 ms/frame). X and Y were drawn randomly from a gaussian distribution and smoothed in time with a sliding window ~7.5 seconds. This generated an image that jittered around on the screen with a slow drift, presenting jitter across different image locations. X and Y were rectified to prevent displaying the image edge. The change in position between frames,  $\Delta X(t)$  and  $\Delta Y(t)$ , was sampled from an independent gaussian distributions with no temporal correlations (white). The standard deviation of the displacement distributions was ~20  $\mu\text{m}$  - corresponding to ~800  $\mu\text{m/s}$  along a single axis. A single dynamically moving image was presented for 60 minutes.

In the static direction protocol, the image was drifted in a single direction at ~1080  $\mu\text{m/s}$  for ~4 seconds before a new direction or image was presented. The image was reoriented for each direction with its longer edge parallel to the direction of motion. Six different images were presented at 8 different directions, spread equally across 360°.

## RGC classification

oDSGCs and ooDSGCs were identified based on their responses to square wave gratings (960  $\mu\text{m}/\text{cycle}$ ) drifted in 8 different directions and two different speeds (1 and 1/4 Hz). Responses to each grating were quantified by total spike number generated during the 8 seconds each grating was presented. Cells were first clustered as DSGCs, then separated as ON-OFF and ON cells, and then grouped by their preferred direction<sup>11</sup>. "Direction-selective" cells were clustered by their direction-selective indices (DSI)<sup>54</sup> at each grating speed using a 2 dimensional gaussian mixture model. This method avoided setting an arbitrary threshold on DSI. Cells were then clustered by hand using the ratio of their response vector magnitudes for fast and slow gratings. Cells that maintained or increased their vector magnitudes for faster gratings were identified as ON-OFF. This process is based on the speed tuning curve differences between ON and ON-OFF DSGCs in mouse retina<sup>11</sup>. Finally, ooDSGCs were clustered by hand based on the direction of their vector sum. Clustering by their preferred direction was only used to color code Figure 1C and did not contribute to decoding (see Optimal linear estimator).



## Optimal linear and optimal quadratic estimators

An optimal linear estimator (OLE) and optimal quadratic estimator (OQE) were used to estimate the direction of stimulus motion from a set of RGCs responses<sup>38,45</sup>. To do this, the OLE and OQE weight and sum the responses for each RGC:

$$Est = r(t + dt) * W$$

For the OLE RGC responses,  $r$ , were quantified by the number of spikes within a set number of sequential frames (bins) as indicated by the temporal integration time.  $r$  includes an added constant that allows for a default (offset) direction weight. For the OQE,  $r$  includes not only responses of individual cells but also the cross products of all possible cell pairs<sup>45</sup>.  $dt$  allows a time delay between response and the stimulus and was optimized to minimize the mean squared error between the direction estimate and true direction. The weights,  $W$ , were determined during a separate training set using Matlab's backslash operation:

$$W = r(t + dt) \backslash S$$

$S$  is the cartesian coordinates of the stimulus direction. Matlab's backslash operation returns a least-squares solution to a system of linear equations. Training sets for the dynamic motion stimulus consisted of the first  $\frac{3}{4}$  time points and it was tested on the last  $\frac{1}{4}$  time points. Training and testing on fully separated data blocks prevents the decoder from leveraging the PSTH autocorrelation to improve its test error. For the static motion stimulus, the OLE and OQE were trained on 5 images and tested on a hold-out image. Training and testing were redone for each image and errors averaged across all images.

To break correlation structures between cells, binned responses within the test data for the static direction stimulus were circularly shifted by a random amount independently for each cell. This manipulation maintained the direction selectivity of the response averages but broke correlations between cells.

## ooDSGC simulation

A simulation of ooDSGC receptive fields was used to test the observed results in larger and more complete mosaics than available from the measured data. The model consisted of four independent mosaics of modeled receptive fields responding to a moving image. As in the analysis of the measured data, the responses of the modeled neurons were combined to estimate the direction of image motion.

The response,  $R$ , of an individual model neuron was:

$$R = N(F_{\phi p} * S)$$

Where  $F_{\phi p}$ , is the linear filter with preferred direction,  $\phi$ , and position  $p$ ;  $S$  is the stimulus;  $*$  indicates convolution; and  $N$  is a nonlinear function. The position,  $p$ , of each filter,  $F$ , was determined by an exclusion zone algorithm for generating 2 dimensional spatial mosaics<sup>68</sup>.  $N$  was chosen as rectified linear function symmetric about zero – allowing responses to be ON-OFF with some control of the response sparsity. The threshold of the nonlinearity was adjusted to provide a similar fraction of spikes as that measured in the ooDSGCs population (90-95% of the bins had

no activity). The density of the simulated mosaics was 30 cells/mm<sup>2</sup> based on reported values in ooDSGCs in rabbit<sup>13</sup>. The population response,  $\underline{R}$ , was decoded based on a linear model  $\text{Est} = \underline{\Sigma}(\underline{R}^* \phi)$ .

To understand how high frequency noise constrained decoding error we added gaussian white noise with a variance equal to the signal variance. Decoding was performed on the noisy signals without manipulation or after averaging from 10-frame bins.

### Spatial-temporal tradeoff simulation

A simulation of signal estimation was used to understand the tradeoffs inherent in separating signal from noise through spatial and temporal integration. The signal,  $S$ , was constructed by convolving spatial and temporal gaussian filters with white noise, creating a signal dominated by low spatial and temporal frequencies. Unfiltered white noise was then added to  $S$ . Then the noisy signal was filtered by convolving spatial and temporal Gaussian filters defined by their standard deviations,  $\sigma$ . The mean squared error was calculated between the filtered output and  $S$ .

### Bibliography

- 1 Panzeri, S., Macke, J. H., Gross, J. & Kayser, C. Neural population coding: combining insights from microscopic and mass signals. *Trends Cogn Sci* **19**, 162-172, doi:10.1016/j.tics.2015.01.002 (2015).
- 2 Pouget, A., Dayan, P. & Zemel, R. Information processing with population codes. *Nat Rev Neurosci* **1**, 125-132, doi:10.1038/35039062 (2000).
- 3 Felsen, G. & Dan, Y. A natural approach to studying vision. *Nat Neurosci* **8**, 1643-1646, doi:10.1038/nn1608 (2005).
- 4 Fitzgerald, J. E. & Clark, D. A. Nonlinear circuits for naturalistic visual motion estimation. *Elife* **4**, e09123, doi:10.7554/eLife.09123 (2015).
- 5 Barlow, H. B., Hill, R. M. & Levick, W. R. Retinal Ganglion Cells Responding Selectively to Direction and Speed of Image Motion in the Rabbit. *J Physiol* **173**, 377-407 (1964).
- 6 Vaney, D. I., Sivyer, B. & Taylor, W. R. Direction selectivity in the retina: symmetry and asymmetry in structure and function. *Nat Rev Neurosci* **13**, 194-208, doi:10.1038/nrn3165 (2012).
- 7 Morrie, R. D. & Feller, M. B. Development of synaptic connectivity in the retinal direction selective circuit. *Curr Opin Neurobiol* **40**, 45-52, doi:10.1016/j.conb.2016.06.009 (2016).
- 8 Demb, J. B. Cellular mechanisms for direction selectivity in the retina. *Neuron* **55**, 179-186, doi:10.1016/j.neuron.2007.07.001 (2007).
- 9 Devries, S. H. & Baylor, D. A. Mosaic arrangement of ganglion cell receptive fields in rabbit retina. *J Neurophysiol* **78**, 2048-2060, doi:10.1152/jn.1997.78.4.2048 (1997).
- 10 Oyster, C. W. & Barlow, H. B. Direction-selective units in rabbit retina: distribution of preferred directions. *Science* **155**, 841-842 (1967).
- 11 Yao, X. *et al.* Gap Junctions Contribute to Differential Light Adaptation across Direction-Selective Retinal Ganglion Cells. *Neuron*, doi:10.1016/j.neuron.2018.08.021 (2018).
- 12 Trenholm, S., Schwab, D. J., Balasubramanian, V. & Awatramani, G. B. Lag normalization in an electrically coupled neural network. *Nat Neurosci* **16**, 154-156, doi:10.1038/nn.3308 (2013).
- 13 Vaney, D. I. Territorial organization of direction-selective ganglion cells in rabbit retina. *J Neurosci* **14**, 6301-6316 (1994).

- 14 Kay, J. N. *et al.* Retinal ganglion cells with distinct directional preferences differ in molecular identity, structure, and central projections. *J Neurosci* **31**, 7753-7762, doi:10.1523/JNEUROSCI.0907-11.2011 (2011).
- 15 Nowak, P., Dobbins, A. C., Gawne, T. J., Grzywacz, N. M. & Amthor, F. R. Separability of stimulus parameter encoding by on-off directionally selective rabbit retinal ganglion cells. *J Neurophysiol* **105**, 2083-2099, doi:10.1152/jn.00941.2010 (2011).
- 16 Zylberberg, J., Cafaro, J., Turner, M. H., Shea-Brown, E. & Rieke, F. Direction-Selective Circuits Shape Noise to Ensure a Precise Population Code. *Neuron* **89**, 369-383, doi:10.1016/j.neuron.2015.11.019 (2016).
- 17 Vaney, D. I., He, S., Taylor, W. R. & Levick, W. R. in *Motion Vision - Computational, Neural, and Ecological Constraints* (eds Zanker J.M. & Zeil J.) (2001).
- 18 Olveczky, B. P., Baccus, S. A. & Meister, M. Segregation of object and background motion in the retina. *Nature* **423**, 401-408, doi:10.1038/nature01652 (2003).
- 19 Hoggarth, A. *et al.* Specific wiring of distinct amacrine cells in the directionally selective retinal circuit permits independent coding of direction and size. *Neuron* **86**, 276-291, doi:10.1016/j.neuron.2015.02.035 (2015).
- 20 Chiao, C. C. & Masland, R. H. Contextual tuning of direction-selective retinal ganglion cells. *Nat Neurosci* **6**, 1251-1252, doi:10.1038/nn1147 (2003).
- 21 Oyster, C. W. The analysis of image motion by the rabbit retina. *J Physiol* **199**, 613-635 (1968).
- 22 Fiscella, M. *et al.* Visual coding with a population of direction-selective neurons. *J Neurophysiol* **114**, 2485-2499, doi:10.1152/jn.00919.2014 (2015).
- 23 Sabbah, S. *et al.* A retinal code for motion along the gravitational and body axes. *Nature* **546**, 492-497, doi:10.1038/nature22818 (2017).
- 24 Dhande, O. S. *et al.* Genetic dissection of retinal inputs to brainstem nuclei controlling image stabilization. *J Neurosci* **33**, 17797-17813, doi:10.1523/JNEUROSCI.2778-13.2013 (2013).
- 25 Elstrott, J. *et al.* Direction selectivity in the retina is established independent of visual experience and cholinergic retinal waves. *Neuron* **58**, 499-506, doi:10.1016/j.neuron.2008.03.013 (2008).
- 26 Franke, F. *et al.* Structures of Neural Correlation and How They Favor Coding. *Neuron* **89**, 409-422, doi:10.1016/j.neuron.2015.12.037 (2016).
- 27 van Hateren, J. H. & van der Schaaf, A. Independent component filters of natural images compared with simple cells in primary visual cortex. *Proc Biol Sci* **265**, 359-366, doi:10.1098/rspb.1998.0303 (1998).
- 28 Wallace, D. J. *et al.* Rats maintain an overhead binocular field at the expense of constant fusion. *Nature* **498**, 65-69, doi:10.1038/nature12153 (2013).
- 29 Van der Steen, J. & Collewijn, H. Ocular stability in the horizontal, frontal and sagittal planes in the rabbit. *Exp Brain Res* **56**, 263-274 (1984).
- 30 Kuffler, S. W. Discharge patterns and functional organization of mammalian retina. *J Neurophysiol* **16**, 37-68, doi:10.1152/jn.1953.16.1.37 (1953).
- 31 Schwartz, G., Taylor, S., Fisher, C., Harris, R. & Berry, M. J., 2nd. Synchronized firing among retinal ganglion cells signals motion reversal. *Neuron* **55**, 958-969, doi:10.1016/j.neuron.2007.07.042 (2007).
- 32 Perge, J. A., Borghuis, B. G., Bours, R. J., Lankheet, M. J. & van Wezel, R. J. Temporal dynamics of direction tuning in motion-sensitive macaque area MT. *J Neurophysiol* **93**, 2104-2116, doi:10.1152/jn.00601.2004 (2005).
- 33 Koch, K. *et al.* How much the eye tells the brain. *Curr Biol* **16**, 1428-1434, doi:10.1016/j.cub.2006.05.056 (2006).
- 34 McDermott, J., Weiss, Y. & Adelson, E. H. Beyond junctions: nonlocal form constraints on motion interpretation. *Perception* **30**, 905-923, doi:10.1068/p3219 (2001).

- 35 Sung, K., Wojtach, W. T. & Purves, D. An empirical explanation of aperture effects. *Proc Natl Acad Sci U S A* **106**, 298-303, doi:10.1073/pnas.0811702106 (2009).
- 36 Kane, D., Bex, P. & Dakin, S. Quantifying "the aperture problem" for judgments of motion direction in natural scenes. *J Vis* **11**, doi:10.1167/11.3.25 (2011).
- 37 Georgopoulos, A. P., Schwartz, A. B. & Kettner, R. E. Neuronal population coding of movement direction. *Science* **233**, 1416-1419 (1986).
- 38 Salinas, E. & Abbott, L. F. Vector reconstruction from firing rates. *J Comput Neurosci* **1**, 89-107 (1994).
- 39 Simoncelli, E. P. & Olshausen, B. A. Natural image statistics and neural representation. *Annu Rev Neurosci* **24**, 1193-1216, doi:10.1146/annurev.neuro.24.1.1193 (2001).
- 40 Pitkow, X. & Meister, M. Decorrelation and efficient coding by retinal ganglion cells. *Nat Neurosci* **15**, 628-635, doi:10.1038/nn.3064 (2012).
- 41 Cohen, M. R. & Kohn, A. Measuring and interpreting neuronal correlations. *Nat Neurosci* **14**, 811-819, doi:10.1038/nn.2842 (2011).
- 42 Zylberberg, J. The role of untuned neurons in sensory information coding. *bioRxiv* (2018).
- 43 Leavitt, M. L., Pieper, F., Sachs, A. J. & Martinez-Trujillo, J. C. Correlated variability modifies working memory fidelity in primate prefrontal neuronal ensembles. *Proc Natl Acad Sci U S A* **114**, E2494-E2503, doi:10.1073/pnas.1619949114 (2017).
- 44 Schneidman, E., Bialek, W. & Berry, M. J., 2nd. Synergy, redundancy, and independence in population codes. *J Neurosci* **23**, 11539-11553 (2003).
- 45 Shamir, M. & Sompolinsky, H. Nonlinear population codes. *Neural Comput* **16**, 1105-1136, doi:10.1162/089976604773717559 (2004).
- 46 Im, M. & Fried, S. I. Directionally selective retinal ganglion cells suppress luminance responses during natural viewing. *Sci Rep* **6**, 35708, doi:10.1038/srep35708 (2016).
- 47 Chen, Q. & Wei, W. Stimulus-dependent engagement of neural mechanisms for reliable motion detection in the mouse retina. *J Neurophysiol* **120**, 1153-1161, doi:10.1152/jn.00716.2017 (2018).
- 48 Poleg-Polsky, A. & Diamond, J. S. NMDA Receptors Multiplicatively Scale Visual Signals and Enhance Directional Motion Discrimination in Retinal Ganglion Cells. *Neuron* **89**, 1277-1290, doi:10.1016/j.neuron.2016.02.013 (2016).
- 49 Hanson, L., Sethuramanujam, S., deRosenroll, G., Jain, V. & Awatramani, G. B. Retinal direction selectivity in the absence of asymmetric starburst amacrine cell responses. *Elife* **8**, doi:10.7554/eLife.42392 (2019).
- 50 Theunissen, F. E. & Miller, J. P. Representation of sensory information in the cricket cercal sensory system. II. Information theoretic calculation of system accuracy and optimal tuning-curve widths of four primary interneurons. *J Neurophysiol* **66**, 1690-1703, doi:10.1152/jn.1991.66.5.1690 (1991).
- 51 Marre, O. *et al.* High Accuracy Decoding of Dynamical Motion from a Large Retinal Population. *PLoS Comput Biol* **11**, e1004304, doi:10.1371/journal.pcbi.1004304 (2015).
- 52 Kuhn, N. & Gollisch, T. Activity Correlations between Direction-Selective Retinal Ganglion Cells Synergistically Enhance Motion Decoding from Complex Visual Scenes. *Neuron* **101**, 1-14, doi:<https://doi.org/10.1016/j.neuron.2019.01.003> (2019).
- 53 Warland, D. K., Reinagel, P. & Meister, M. Decoding visual information from a population of retinal ganglion cells. *J Neurophysiol* **78**, 2336-2350, doi:10.1152/jn.1997.78.5.2336 (1997).
- 54 Ravi, S., Ahn, D., Greschner, M., Chichilnisky, E. J. & Field, G. D. Pathway-specific asymmetries between ON and OFF visual signals. *the Journal of Neuroscience* (2018).
- 55 Baker, C. L., Jr. Spatial- and temporal-frequency selectivity as a basis for velocity preference in cat striate cortex neurons. *Vis Neurosci* **4**, 101-113 (1990).

- 56 van Hateren, J. H. & Ruderman, D. L. Independent component analysis of natural image sequences yields spatio-temporal filters similar to simple cells in primary visual cortex. *Proc Biol Sci* **265**, 2315-2320, doi:10.1098/rspb.1998.0577 (1998).
- 57 Shamir, M. Emerging principles of population coding: in search for the neural code. *Curr Opin Neurobiol* **25**, 140-148, doi:10.1016/j.conb.2014.01.002 (2014).
- 58 Averbeck, B. B., Latham, P. E. & Pouget, A. Neural correlations, population coding and computation. *Nat Rev Neurosci* **7**, 358-366, doi:10.1038/nrn1888 (2006).
- 59 Amthor, F. R., Tootle, J. S. & Grzywacz, N. M. Stimulus-dependent correlated firing in directionally selective retinal ganglion cells. *Vis Neurosci* **22**, 769-787, doi:10.1017/S0952523805226081 (2005).
- 60 Dayan, P. & Abbott, L. F. *Theoretical Neuroscience Computational and Mathematical Modeling of Neural Systems*. (The MIT Press, 2001).
- 61 Rieke, F., Warland, D. K., de Ruyter van Stevenick, R. & Bialek, W. *Spikes Exploring The Neural Code*. (The MIT Press, 1999).
- 62 Higley, M. J., Soler-Llavina, G. J. & Sabatini, B. L. Cholinergic modulation of multivesicular release regulates striatal synaptic potency and integration. *Nat Neurosci* **12**, 1121-1128, doi:10.1038/nn.2368 (2009).
- 63 Litke, A. M. *et al.* What Does the Eye Tell the Brain?: Development of a System for the Large-Scale Recording of Retinal Output Activity. *IEEE TRANSACTIONS ON NUCLEAR SCIENCE*, **51** (2004).
- 64 Field, G. D. *et al.* Spatial properties and functional organization of small bistratified ganglion cells in primate retina. *J Neurosci* **27**, 13261-13272, doi:10.1523/JNEUROSCI.3437-07.2007 (2007).
- 65 Li, P. H. *et al.* Anatomical identification of extracellularly recorded cells in large-scale multielectrode recordings. *J Neurosci* **35**, 4663-4675, doi:10.1523/JNEUROSCI.3675-14.2015 (2015).
- 66 Petrusca, D. *et al.* Identification and characterization of a Y-like primate retinal ganglion cell type. *J Neurosci* **27**, 11019-11027, doi:10.1523/JNEUROSCI.2836-07.2007 (2007).
- 67 Betsch, B. Y., Einhauser, W., Kording, K. P. & Konig, P. The world from a cat's perspective--statistics of natural videos. *Biol Cybern* **90**, 41-50, doi:10.1007/s00422-003-0434-6 (2004).
- 68 Galli-Resta, L., Novelli, E., Kryger, Z., Jacobs, G. H. & Reese, B. E. Modelling the mosaic organization of rod and cone photoreceptors with a minimal-spacing rule. *European Journal of Neuroscience* **11**, 1461-1469, doi:doi:10.1046/j.1460-9568.1999.00555.x (1999).
